# Supplementary material for: Prebiotic selection and assembly of proteinogenic amino acids and natural nucleotides from complex mixtures
Source: Springer Nature journal article supplement (doi:10.1038/nchem.2703), 2017-01-16
Supplement: 41557_2017_BFnchem2703_MOESM17_ESM.mol [file 41557_2017_BFnchem2703_MOESM17_ESM.mol]

nchem.2703-compflyxo1.mol
  ChemDraw12191610032D

 12 13  0  0  1  0  0  0  0  0999 V2000
   -0.9525   -0.5984    0.0000 C   0  0  0  0  0  0  0  0  0  0  0  0
   -0.1275   -0.5984    0.0000 C   0  0  0  0  0  0  0  0  0  0  0  0
    0.1275    0.1866    0.0000 C   0  0  0  0  0  0  0  0  0  0  0  0
   -0.5400    0.6714    0.0000 O   0  0  0  0  0  0  0  0  0  0  0  0
   -1.2075    0.1866    0.0000 C   0  0  0  0  0  0  0  0  0  0  0  0
   -1.9917    0.4408    0.0000 C   0  0  0  0  0  0  0  0  0  0  0  0
    0.5400   -1.0832    0.0000 O   0  0  0  0  0  0  0  0  0  0  0  0
    1.2075   -0.5984    0.0000 C   0  0  0  0  0  0  0  0  0  0  0  0
    0.9525    0.1866    0.0000 N   0  0  0  0  0  0  0  0  0  0  0  0
   -1.4374   -1.2659    0.0000 O   0  0  0  0  0  0  0  0  0  0  0  0
   -1.9917    1.2659    0.0000 O   0  0  0  0  0  0  0  0  0  0  0  0
    1.9917   -0.8533    0.0000 N   0  0  0  0  0  0  0  0  0  0  0  0
  1  2  1  0      
  2  3  1  0      
  3  4  1  0      
  4  5  1  0      
  5  1  1  0      
  5  6  1  1      
  2  7  1  1      
  7  8  1  0      
  8  9  2  0      
  3  9  1  1      
  1 10  1  1      
  6 11  1  0      
  8 12  1  0      
M  END
