# Supplementary material for: Prebiotic selection and assembly of proteinogenic amino acids and natural nucleotides from complex mixtures
Source: Springer Nature journal article supplement (doi:10.1038/nchem.2703), 2017-01-16
Supplement: 41557_2017_BFnchem2703_MOESM20_ESM.mol [file 41557_2017_BFnchem2703_MOESM20_ESM.mol]

nchem.2703-compplyxo1.mol
  ChemDraw12191610032D

 12 13  0  0  1  0  0  0  0  0999 V2000
    0.1226   -0.0545    0.0000 C   0  0  0  0  0  0  0  0  0  0  0  0
    0.3016    0.7509    0.0000 C   0  0  0  0  0  0  0  0  0  0  0  0
    0.8330   -0.4734    0.0000 O   0  0  0  0  0  0  0  0  0  0  0  0
    1.4510    0.0727    0.0000 C   0  0  0  0  0  0  0  0  0  0  0  0
    1.1226    0.8295    0.0000 N   0  0  0  0  0  0  0  0  0  0  0  0
    2.2557   -0.1063    0.0000 N   0  0  0  0  0  0  0  0  0  0  0  0
   -0.3064    1.3085    0.0000 O   0  0  0  0  0  0  0  0  0  0  0  0
   -1.0934    1.0608    0.0000 C   0  0  0  0  0  0  0  0  0  0  0  0
   -1.2723    0.2555    0.0000 C   0  0  0  0  0  0  0  0  0  0  0  0
   -0.6643   -0.3022    0.0000 C   0  0  0  0  0  0  0  0  0  0  0  0
   -0.8879   -1.3085    0.0000 O   0  0  0  0  0  0  0  0  0  0  0  0
   -2.2557   -0.0540    0.0000 O   0  0  0  0  0  0  0  0  0  0  0  0
  1  2  1  0      
  1  3  1  1      
  3  4  1  0      
  4  5  2  0      
  2  5  1  1      
  4  6  1  0      
  2  7  1  0      
  7  8  1  0      
  8  9  1  0      
  9 10  1  0      
 10  1  1  0      
 10 11  1  1      
  9 12  1  6      
M  END
