# Supplementary material for: Prebiotic selection and assembly of proteinogenic amino acids and natural nucleotides from complex mixtures
Source: Springer Nature journal article supplement (doi:10.1038/nchem.2703), 2017-01-16
Supplement: 41557_2017_BFnchem2703_MOESM97_ESM.mol [file 41557_2017_BFnchem2703_MOESM97_ESM.mol]

nchem.2703-comp7.mol
  ChemDraw12191610032D

  6  6  0  0  0  0  0  0  0  0999 V2000
   -1.0445    0.4157    0.0000 C   0  0  0  0  0  0  0  0  0  0  0  0
   -1.0481   -0.4093    0.0000 C   0  0  0  0  0  0  0  0  0  0  0  0
   -0.2646   -0.6671    0.0000 S   0  0  0  0  0  0  0  0  0  0  0  0
    0.2231   -0.0025    0.0000 C   0  0  0  0  0  0  0  0  0  0  0  0
   -0.2589    0.6671    0.0000 N   0  0  0  0  0  0  0  0  0  0  0  0
    1.0481   -0.0054    0.0000 N   0  0  0  0  0  0  0  0  0  0  0  0
  1  2  2  0      
  2  3  1  0      
  3  4  1  0      
  4  5  2  0      
  5  1  1  0      
  4  6  1  0      
M  END
