# Supplementary material for: Prebiotic selection and assembly of proteinogenic amino acids and natural nucleotides from complex mixtures
Source: Springer Nature journal article supplement (doi:10.1038/nchem.2703), 2017-01-16
Supplement: 41557_2017_BFnchem2703_MOESM129_ESM.mol [file 41557_2017_BFnchem2703_MOESM129_ESM.mol]

nchem.2703-comp8e.mol
  ChemDraw12191610032D

 14 15  0  0  0  0  0  0  0  0999 V2000
   -0.3707   -1.3206    0.0000 N   0  0  0  0  0  0  0  0  0  0  0  0
    0.3438   -0.9081    0.0000 C   0  0  0  0  0  0  0  0  0  0  0  0
    0.3438   -0.0831    0.0000 N   0  0  0  0  0  0  0  0  0  0  0  0
    1.0588    0.3289    0.0000 C   0  0  0  0  0  0  0  0  0  0  0  0
   -1.0852   -0.9081    0.0000 C   0  0  0  0  0  0  0  0  0  0  0  0
    1.8122   -0.0069    0.0000 S   0  0  0  0  0  0  0  0  0  0  0  0
    2.3645    0.6062    0.0000 C   0  0  0  0  0  0  0  0  0  0  0  0
    1.9520    1.3206    0.0000 C   0  0  0  0  0  0  0  0  0  0  0  0
    1.1447    1.1493    0.0000 N   0  0  0  0  0  0  0  0  0  0  0  0
   -1.1069   -0.0837    0.0000 N   0  0  0  0  0  0  0  0  0  0  0  0
   -1.8982    0.1501    0.0000 C   0  0  0  0  0  0  0  0  0  0  0  0
   -2.3645   -0.5294    0.0000 C   0  0  0  0  0  0  0  0  0  0  0  0
   -1.8982   -1.1837    0.0000 S   0  0  0  0  0  0  0  0  0  0  0  0
    1.0583   -1.3206    0.0000 C   0  0  0  0  0  0  0  0  0  0  0  0
  1  2  1  0      
  2  3  1  0      
  3  4  1  0      
  1  5  1  0      
  4  6  1  0      
  6  7  1  0      
  7  8  2  0      
  8  9  1  0      
  9  4  2  0      
  5 10  2  0      
 10 11  1  0      
 11 12  2  0      
 12 13  1  0      
 13  5  1  0      
  2 14  1  0      
M  END
