# Supplementary material for: Prebiotic selection and assembly of proteinogenic amino acids and natural nucleotides from complex mixtures
Source: Springer Nature journal article supplement (doi:10.1038/nchem.2703), 2017-01-16
Supplement: 41557_2017_BFnchem2703_MOESM137_ESM.cif [file 41557_2017_BFnchem2703_MOESM137_ESM.cif]

#\#CIF_1.1
 
#  CIF produced by WinGX routine CIF_UPDATE
#  Created on 2016-04-06 at 17:11:03
#  Using CIFtbx version 3.0.4  1 Sep 2006
 
#  Dictionary name : cif_core.dic
#  Dictionary vers : 2.4.3
#  Request file    : c:\wingx\files\archive.reqdat
#  CIF files read  : xstr0545 xstr0545
 
#------------------ SECTION 1. GLOBAL INFORMATION ---------------------------#
 
data_global
 
#------------------ AUDIT DETAILS -------------------------------------------#
 
_audit_creation_date            2016-04-06
_audit_creation_method          'WinGX routine CIF_UPDATE'
_audit_conform_dict_name        cif_core.dic
_audit_conform_dict_version     2.4
_audit_conform_dict_location    ftp://ftp.iucr.org/pub/cif_core.dic
_audit_update_record            ?
 
#==============================================================================
#
# SUBMISSION DETAILS
# Name and address of author for correspondence
 
_publ_contact_author_name       'Powner, Matthew W.'
_publ_contact_author_address
;
Department of Chemistry
University College London
20 Gordon Street
London WC1H 0AJ
UK
;
_publ_contact_author_email       'matthew.powner@ucl.ac.uk'
_publ_contact_author_fax         ' '
_publ_contact_author_phone       '+44(0)2076794542' 
 
#==============================================================================
#
# TITLE AND AUTHOR LIST
 
loop_
 _publ_author_name
 _publ_author_address
'Islam, Saidul'
;
Department of Chemistry
University College London
20 Gordon Street
London WC1H 0AJ
UK
;
'Bucar, Dejan-Kresimir'
;
Department of Chemistry
University College London
20 Gordon Street
London WC1H 0AJ
UK
;
'Powner, Matthew W.'
;
Department of Chemistry
University College London
20 Gordon Street
London WC1H 0AJ
UK
;
 
#------------------  SECTION 2. COMPOUND(S) DETAILS -------------------------#
 
data_09
 
_audit_creation_date                    2016-04-06T17:11:03-00:00
_audit_creation_method                  'WinGX routine CIF_UPDATE'
 
#----------------------------------------------------------------------------#
#                   CHEMICAL INFORMATION                                     #
#----------------------------------------------------------------------------#
 
_chemical_formula_moiety		'C9 H12 N4 O S2'
_chemical_formula_sum                   'C9 H12 N4 O S2'
_chemical_formula_weight                256.35
_chemical_absolute_configuration        ad
 
#----------------------------------------------------------------------------#
#                   UNIT CELL INFORMATION                                    #
#----------------------------------------------------------------------------#
 
_space_group_crystal_system             orthorhombic
_space_group_name_H-M_alt               'P m n 21'
_space_group_name_Hall                  'P 2ac -2'
_space_group_IT_number                  31
loop_
    _space_group_symop_operation_xyz
'x, y, z'
'-x+1/2, -y, z+1/2'
'-x, y, z'
'x+1/2, -y, z+1/2'
 
_cell_length_a                          19.0797(4)
_cell_length_b                          8.9261(2)
_cell_length_c                          6.8582(2)
_cell_angle_alpha                       90
_cell_angle_beta                        90
_cell_angle_gamma                       90
_cell_volume                            1168.00(5)
_cell_formula_units_Z                   4
_cell_measurement_temperature   	149.99(10) 
_cell_measurement_reflns_used   	12690
_cell_measurement_theta_min     	4.6330
_cell_measurement_theta_max     	72.8330
 
#----------------------------------------------------------------------------#
#                   CRYSTAL INFORMATION                                      #
#----------------------------------------------------------------------------#

_exptl_crystal_description        	'prism'
_exptl_crystal_colour             	colourless
_exptl_crystal_size_max                 0.18
_exptl_crystal_size_mid                 0.12
_exptl_crystal_size_min                 0.03 
_exptl_crystal_density_diffrn           1.458
_exptl_crystal_F_000                    536
 
#----------------------------------------------------------------------------#
#                   ABSORPTION CORRECTION                                    #
#----------------------------------------------------------------------------#
 
_exptl_absorpt_coefficient_mu           4.025
_exptl_absorpt_correction_T_min         0.55071
_exptl_absorpt_correction_T_max         1.00000
_exptl_absorpt_correction_type          'multi-scan'
_exptl_absorpt_process_details
;
CrysAlisPro, Agilent Technologies,
Version 1.171.37.35 (release 13-08-2014 CrysAlis171 .NET)
(compiled Aug 13 2014,18:06:01)
Empirical absorption correction using spherical harmonics,
 implemented in SCALE3 ABSPACK scaling algorithm.
;
 
#----------------------------------------------------------------------------#
#                   DATA COLLECTION                                          #
#----------------------------------------------------------------------------#
 
_diffrn_ambient_temperature             149.99(10) 
_diffrn_ambient_environment 		'N~2~'
_diffrn_source 			'sealed X-ray tube'
_diffrn_source_type 		'SuperNova (Cu) X-ray Source'
_diffrn_radiation_probe 		'x-ray'
_diffrn_radiation_type 		'Cu K\a'
_diffrn_radiation_wavelength 		1.54184
_diffrn_radiation_monochromator 	'mirror'
_diffrn_measurement_device 		'four-circle diffractometer'
_diffrn_measurement_device_type 	'SuperNova, Dual, Cu at zero, Atlas'
_diffrn_measurement_method              '\w scans'
_diffrn_detector 			'CCD plate'
_diffrn_detector_type 		'Atlas'
_diffrn_reflns_av_R_equivalents         0.0401
_diffrn_reflns_av_unetI/netI            0.0164
_diffrn_reflns_number                   21526
_diffrn_reflns_limit_h_min              -22
_diffrn_reflns_limit_h_max              22
_diffrn_reflns_limit_k_min              -10
_diffrn_reflns_limit_k_max              10
_diffrn_reflns_limit_l_min              -8
_diffrn_reflns_limit_l_max              8
_diffrn_reflns_theta_min                4.635
_diffrn_reflns_theta_max                66.599
_diffrn_reflns_theta_full               66.599
_diffrn_measured_fraction_theta_full
                                        1
_diffrn_measured_fraction_theta_max
                                        1
_diffrn_reflns_Laue_measured_fraction_full
                                        1
_diffrn_reflns_Laue_measured_fraction_max
                                        1
_diffrn_reflns_point_group_measured_fraction_full
                                        1
_diffrn_reflns_point_group_measured_fraction_max
                                        1
_reflns_Friedel_fraction_full           1
_reflns_Friedel_fraction_max            1
_reflns_Friedel_coverage                0.832
_reflns_number_total                    2130
_reflns_number_gt                       2052
_reflns_threshold_expression            'I > 2\s(I)'
 
#----------------------------------------------------------------------------#
#                   COMPUTER PROGRAMS USED                                   #
#----------------------------------------------------------------------------#
 
_computing_data_collection
;
CrysAlisPro, Agilent Technologies,
Version 1.171.37.34 (release 22-05-2014 CrysAlis171 .NET)
(compiled May 22 2014,16:03:01)
;
_computing_cell_refinement
;
CrysAlisPro, Agilent Technologies,
Version 1.171.37.34 (release 22-05-2014 CrysAlis171 .NET)
(compiled May 22 2014,16:03:01)
;
_computing_data_reduction
;
CrysAlisPro, Agilent Technologies,
Version 1.171.37.34 (release 22-05-2014 CrysAlis171 .NET)
(compiled May 22 2014,16:03:01)
;
_computing_structure_refinement         'SHELXL-97 (Sheldrick, 2008)'
 
#----------------------------------------------------------------------------#
#                   STRUCTURE SOLUTION                                       #
#----------------------------------------------------------------------------#
 
_atom_sites_solution_hydrogens          geom
 
#----------------------------------------------------------------------------#
#                   REFINEMENT INFORMATION                                   #
#----------------------------------------------------------------------------#
 
_refine_special_details
;
 Refined as a 2-component perfect inversion twin.
;
_refine_ls_structure_factor_coef        Fsqd
_refine_ls_matrix_type                  full
_refine_ls_weighting_scheme             calc
_refine_ls_weighting_details
              'w=1/[\s^2^(Fo^2^)+(0.0580P)^2^+2.1613P] where P=(Fo^2^+2Fc^2^)/3'
_refine_ls_hydrogen_treatment           constr
_refine_ls_extinction_method            none
_refine_ls_number_reflns                2130
_refine_ls_number_parameters            157
_refine_ls_number_restraints            7
_refine_ls_R_factor_all                 0.0631
_refine_ls_R_factor_gt                  0.061
_refine_ls_wR_factor_ref                0.1453
_refine_ls_wR_factor_gt                 0.1437
_refine_ls_goodness_of_fit_ref          1.038
_refine_ls_restrained_S_all             1.15
_refine_ls_shift/su_max                 0.001
_refine_ls_shift/su_mean                0
_refine_ls_abs_structure_details
;
 Refined as a perfect inversion twin.
;
_refine_ls_abs_structure_Flack          0.5
_refine_diff_density_max                0.623
_refine_diff_density_min                -0.569
_refine_diff_density_rms                0.061
 
#----------------------------------------------------------------------------#
#                   CONSTRAINTS AND RESTRAINTS                               #
#----------------------------------------------------------------------------#
 
 
#----------------------------------------------------------------------------#
#                   ATOMIC TYPES, COORDINATES AND THERMAL PARAMETERS         #
#----------------------------------------------------------------------------#
 
loop_
    _atom_type_symbol
    _atom_type_description
    _atom_type_scat_dispersion_real
    _atom_type_scat_dispersion_imag
    _atom_type_scat_source
C C 0.0181 0.0091 'International Tables Vol C Tables 4.2.6.8 and 6.1.1.4'
H H 0 0 'International Tables Vol C Tables 4.2.6.8 and 6.1.1.4'
O O 0.0492 0.0322 'International Tables Vol C Tables 4.2.6.8 and 6.1.1.4'
S S 0.3331 0.5567 'International Tables Vol C Tables 4.2.6.8 and 6.1.1.4'
N N 0.0311 0.018 'International Tables Vol C Tables 4.2.6.8 and 6.1.1.4'
 
loop_
    _atom_site_label
    _atom_site_type_symbol
    _atom_site_fract_x
    _atom_site_fract_y
    _atom_site_fract_z
    _atom_site_U_iso_or_equiv
    _atom_site_adp_type
    _atom_site_occupancy
    _atom_site_site_symmetry_order
    _atom_site_calc_flag
    _atom_site_refinement_flags_posn
    _atom_site_refinement_flags_adp
    _atom_site_refinement_flags_occupancy
    _atom_site_disorder_assembly
    _atom_site_disorder_group
S1 S 0.33127(11) 0.3811(4) 0.0655(5) 0.0478(7) Uani 0.5 1 d G . P A -1
C1 C 0.28958(13) 0.5508(5) 0.0270(6) 0.051(2) Uani 0.5 1 d G . P A -1
H1 H 0.2504 0.5648 -0.0517 0.061 Uiso 0.5 1 calc R U P A -1
C2 C 0.32233(15) 0.6594(4) 0.1282(8) 0.045(2) Uani 0.5 1 d G . P A -1
H2 H 0.3072 0.7584 0.1241 0.054 Uiso 0.5 1 calc R U P A -1
N1 N 0.37975(15) 0.6165(3) 0.2391(7) 0.0345(14) Uani 0.5 1 d G . P A -1
C3 C 0.39060(12) 0.4717(3) 0.2195(4) 0.0295(16) Uani 0.5 1 d G . P A -1
N2 N 0.44235(12) 0.3973(3) 0.3107(4) 0.0307(17) Uani 0.5 1 d DG . P A -1
H2A H 0.4457 0.3025 0.2902 0.037 Uiso 0.5 1 calc R U P A -1
S2 S 0.67079(11) 0.3457(4) 0.1678(7) 0.0478(7) Uani 0.5 1 d G . P A -1
C7 C 0.69465(12) 0.4972(5) 0.0247(8) 0.051(2) Uani 0.5 1 d G . P A -1
H7 H 0.7306 0.4969 -0.067 0.061 Uiso 0.5 1 calc R U P A -1
C6 C 0.65341(14) 0.6153(4) 0.0661(9) 0.045(2) Uani 0.5 1 d G . P A -1
H6 H 0.659 0.707 0.0035 0.054 Uiso 0.5 1 calc R U P A -1
N4 N 0.60215(14) 0.5938(3) 0.2068(8) 0.0345(14) Uani 0.5 1 d G . P A -1
C5 C 0.60530(12) 0.4558(3) 0.2736(6) 0.0295(16) Uani 0.5 1 d G . P A -1
N3 N 0.56177(13) 0.4013(4) 0.4105(5) 0.0307(17) Uani 0.5 1 d DG . P A -1
H3 H 0.5751 0.3271 0.4813 0.037 Uiso 0.5 1 calc R U P A -1
C4 C 0.4929(2) 0.4652(8) 0.4410(10) 0.029(2) Uani 0.5 1 d D . P A -1
H4 H 0.4946 0.5734 0.4174 0.035 Uiso 0.5 1 calc R U P A -1
C8 C 0.4701(6) 0.4362(10) 0.6496(15) 0.034(2) Uani 0.5 1 d D . P A -1
H8 H 0.4211 0.467 0.6642 0.04 Uiso 0.5 1 calc R U P A -1
C9 C 0.513(3) 0.5207(14) 0.7860(19) 0.067(14) Uani 0.5 1 d D . P A -1
H9A H 0.4956 0.5051 0.9161 0.1 Uiso 0.5 1 calc R U P A -1
H9B H 0.5102 0.6254 0.7546 0.1 Uiso 0.5 1 calc R U P A -1
H9C H 0.5605 0.4876 0.7776 0.1 Uiso 0.5 1 calc R U P A -1
O1 O 0.4759(4) 0.2806(7) 0.6973(11) 0.0347(18) Uani 0.5 1 d . . P A -1
H1O H 0.4523 0.2312 0.6207 0.052 Uiso 0.5 1 calc R U P A -1
S3 S 0.1735(3) 0.1612(8) 0.0908(7) 0.0478(7) Uani 0.5 1 d G . P B -1
C10 C 0.2101(3) 0.0032(10) 0.1961(8) 0.061(3) Uani 0.5 1 d G . P B -1
H10 H 0.2487 0.0031 0.279 0.073 Uiso 0.5 1 calc R U P B -1
C11 C 0.1744(3) -0.1194(8) 0.1399(8) 0.046(3) Uani 0.5 1 d G . P B -1
H11 H 0.187 -0.2147 0.1819 0.055 Uiso 0.5 1 calc R U P B -1
N5 N 0.1178(3) -0.0967(5) 0.0163(7) 0.0338(15) Uani 0.5 1 d G . P B -1
C12 C 0.1112(3) 0.0470(5) -0.0222(4) 0.0340(13) Uani 0.5 1 d G . P B -1
N6 N 0.0606(3) 0.1037(4) -0.1370(4) 0.0441(14) Uani 0.5 1 d DG . P B -1
H6A H 0.0639 0.1949 -0.1766 0.053 Uiso 0.5 1 calc R U P B -1
S4 S -0.1739(3) 0.1889(7) 0.0478(12) 0.0539(16) Uani 0.5 1 d G . P B -1
C16 C -0.2072(3) 0.0555(8) 0.2058(13) 0.061(3) Uani 0.5 1 d G . P B -1
H16 H -0.2458 0.069 0.2869 0.073 Uiso 0.5 1 calc R U P B -1
C15 C -0.1690(3) -0.0709(7) 0.1936(13) 0.046(3) Uani 0.5 1 d G . P B -1
H15 H -0.1792 -0.1545 0.2692 0.055 Uiso 0.5 1 calc R U P B -1
N8 N -0.1135(3) -0.0702(5) 0.0627(10) 0.0338(15) Uani 0.5 1 d G . P B -1
C14 C -0.1099(3) 0.0607(5) -0.0249(9) 0.0340(13) Uani 0.5 1 d G . P B -1
N7 N -0.0617(3) 0.0947(4) -0.1610(7) 0.0441(14) Uani 0.5 1 d DG . P B -1
H7A H -0.0697 0.1717 -0.233 0.053 Uiso 0.5 1 calc R U P B -1
C13 C 0.0006(3) 0.0147(3) -0.1955(5) 0.032(2) Uani 0.5 1 d DG . P B -1
H13 H -0.0003 -0.0756 -0.1144 0.039 Uiso 0.5 1 calc R U P B -1
C18 C -0.006(5) 0.0924(12) -0.5553(16) 0.049(9) Uani 0.5 1 d D . P B -1
H18A H -0.0093 0.05 -0.6836 0.073 Uiso 0.5 1 calc R U P B -1
H18B H 0.0289 0.1696 -0.5543 0.073 Uiso 0.5 1 calc R U P B -1
H18C H -0.0506 0.1343 -0.5193 0.073 Uiso 0.5 1 calc R U P B -1
O2 O -0.0340(5) -0.1491(8) -0.4416(13) 0.053(2) Uani 0.5 1 d . . P B -1
H2O H -0.0246 -0.1899 -0.5455 0.08 Uiso 0.5 1 calc R U P B -1
C17 C 0.0147(6) -0.0333(10) -0.4056(17) 0.039(4) Uani 0.5 1 d D . P B -1
H17 H 0.0631 -0.067 -0.4239 0.046 Uiso 0.5 1 calc R U P B -1
 
loop_
    _atom_site_aniso_label
    _atom_site_aniso_U_11
    _atom_site_aniso_U_22
    _atom_site_aniso_U_33
    _atom_site_aniso_U_23
    _atom_site_aniso_U_13
    _atom_site_aniso_U_12
S1 0.0432(9) 0.0470(14) 0.0531(17) -0.0187(14) 0.0019(9) -0.0059(9)
C1 0.041(5) 0.059(8) 0.053(5) -0.014(5) 0.011(5) 0.008(4)
C2 0.047(6) 0.037(5) 0.050(6) -0.003(5) -0.009(4) -0.006(3)
N1 0.037(4) 0.025(3) 0.042(3) 0.002(2) -0.001(3) 0.001(3)
C3 0.040(3) 0.025(3) 0.023(4) -0.002(3) 0.002(3) 0.001(5)
N2 0.041(3) 0.019(2) 0.032(5) 0.000(4) 0.002(2) 0.007(3)
S2 0.0432(9) 0.0470(14) 0.0531(17) -0.0187(14) 0.0019(9) -0.0059(9)
C7 0.041(5) 0.059(8) 0.053(5) -0.014(5) 0.011(5) 0.008(4)
C6 0.047(6) 0.037(5) 0.050(6) -0.003(5) -0.009(4) -0.006(3)
N4 0.037(4) 0.025(3) 0.042(3) 0.002(2) -0.001(3) 0.001(3)
C5 0.040(3) 0.025(3) 0.023(4) -0.002(3) 0.002(3) 0.001(5)
N3 0.041(3) 0.019(2) 0.032(5) 0.000(4) 0.002(2) 0.007(3)
C4 0.040(6) 0.015(3) 0.034(4) 0.002(3) -0.013(7) -0.009(7)
C8 0.054(6) 0.015(4) 0.031(5) 0.000(4) 0.007(4) -0.007(4)
C9 0.11(4) 0.045(6) 0.042(6) -0.001(5) -0.004(10) -0.027(14)
O1 0.051(5) 0.025(3) 0.028(3) 0.001(3) 0.003(3) -0.007(3)
S3 0.0432(9) 0.0470(14) 0.0531(17) -0.0187(14) 0.0019(9) -0.0059(9)
C10 0.048(4) 0.084(10) 0.051(4) 0.003(6) -0.008(8) -0.005(5)
C11 0.045(4) 0.068(8) 0.026(6) 0.006(6) 0.003(4) 0.003(5)
N5 0.034(2) 0.042(3) 0.025(4) 0.002(3) 0.003(3) 0.007(4)
C12 0.032(3) 0.033(3) 0.037(3) -0.004(2) -0.004(16) -0.002(9)
N6 0.038(3) 0.023(2) 0.072(4) 0.015(3) -0.010(9) -0.003(10)
S4 0.0437(17) 0.052(3) 0.065(3) -0.009(2) 0.017(2) 0.0159(17)
C16 0.048(4) 0.084(10) 0.051(4) 0.003(6) -0.008(8) -0.005(5)
C15 0.045(4) 0.068(8) 0.026(6) 0.006(6) 0.003(4) 0.003(5)
N8 0.034(2) 0.042(3) 0.025(4) 0.002(3) 0.003(3) 0.007(4)
C14 0.032(3) 0.033(3) 0.037(3) -0.004(2) -0.004(16) -0.002(9)
N7 0.038(3) 0.023(2) 0.072(4) 0.015(3) -0.010(9) -0.003(10)
C13 0.036(5) 0.020(4) 0.042(5) 0.001(4) 0.030(12) 0.008(16)
C18 0.08(3) 0.032(5) 0.032(5) 0.009(4) 0.013(18) -0.013(16)
O2 0.093(6) 0.032(4) 0.036(4) -0.003(4) 0.006(5) -0.024(4)
C17 0.045(13) 0.027(4) 0.044(6) -0.003(4) 0.003(5) -0.002(4)
 
 
#----------------------------------------------------------------------------#
#                   MOLECULAR GEOMETRY                                       #
#----------------------------------------------------------------------------#
 
_geom_special_details
;
 All esds (except the esd in the dihedral angle between two l.s. planes)
 are estimated using the full covariance matrix.  The cell esds are taken
 into account individually in the estimation of esds in distances, angles
 and torsion angles; correlations between esds in cell parameters are only
 used when they are defined by crystal symmetry.  An approximate (isotropic)
 treatment of cell esds is used for estimating esds involving l.s. planes.
;
loop_
    _geom_bond_atom_site_label_1
    _geom_bond_atom_site_label_2
    _geom_bond_distance
    _geom_bond_site_symmetry_2
    _geom_bond_publ_flag
S1 C1 1.7312 . ?
S1 C3 1.7472 . ?
C1 C2 1.3461 . ?
C2 N1 1.3872 . ?
N1 C3 1.3156 . ?
C3 N2 1.3447 . ?
N2 C4 1.447(3) . ?
S2 C7 1.7312 . ?
S2 C5 1.7472 . ?
C7 C6 1.3462 . ?
C6 N4 1.3872 . ?
N4 C5 1.3156 . ?
C5 N3 1.3446 . ?
N3 C4 1.448(3) . ?
C4 C8 1.517(13) . ?
C8 O1 1.430(11) . ?
C8 C9 1.45(3) . ?
S3 C10 1.7312 . ?
S3 C12 1.7472 . ?
C10 C11 1.3462 . ?
C11 N5 1.3872 . ?
N5 C12 1.3156 . ?
C12 N6 1.3447 . ?
N6 C13 1.4504 . ?
S4 C16 1.7312 . ?
S4 C14 1.7472 . ?
C16 C15 1.3461 . ?
C15 N8 1.3872 . ?
N8 C14 1.3156 . ?
C14 N7 1.3446 . ?
N7 C13 1.4059 . ?
C13 C17 1.528(11) . ?
C18 C17 1.57(3) . ?
O2 C17 1.411(13) . ?
 
loop_
    _geom_angle_atom_site_label_1
    _geom_angle_atom_site_label_2
    _geom_angle_atom_site_label_3
    _geom_angle
    _geom_angle_site_symmetry_1
    _geom_angle_site_symmetry_3
    _geom_angle_publ_flag
C1 S1 C3 89.1 . . ?
C2 C1 S1 109.8 . . ?
C1 C2 N1 116.8 . . ?
C3 N1 C2 109.8 . . ?
N1 C3 N2 123.6 . . ?
N1 C3 S1 114.5 . . ?
N2 C3 S1 121.9 . . ?
C3 N2 C4 124.7(3) . . ?
C7 S2 C5 89.1 . . ?
C6 C7 S2 109.8 . . ?
C7 C6 N4 116.8 . . ?
C5 N4 C6 109.9 . . ?
N4 C5 N3 123.6 . . ?
N4 C5 S2 114.5 . . ?
N3 C5 S2 121.9 . . ?
C5 N3 C4 121.3(4) . . ?
N2 C4 N3 110.5(2) . . ?
N2 C4 C8 108.6(6) . . ?
N3 C4 C8 109.2(7) . . ?
O1 C8 C9 108.3(11) . . ?
O1 C8 C4 111.0(7) . . ?
C9 C8 C4 111.0(14) . . ?
C10 S3 C12 89.1 . . ?
C11 C10 S3 109.8 . . ?
C10 C11 N5 116.8 . . ?
C12 N5 C11 109.8 . . ?
N5 C12 N6 123.6 . . ?
N5 C12 S3 114.5 . . ?
N6 C12 S3 121.9 . . ?
C12 N6 C13 121.5 . . ?
C16 S4 C14 89.1 . . ?
C15 C16 S4 109.8 . . ?
C16 C15 N8 116.8 . . ?
C14 N8 C15 109.8 . . ?
N8 C14 N7 123.6 . . ?
N8 C14 S4 114.5 . . ?
N7 C14 S4 121.9 . . ?
C14 N7 C13 125.4 . . ?
N7 C13 N6 110.1 . . ?
N7 C13 C17 116.8(5) . . ?
N6 C13 C17 106.0(5) . . ?
O2 C17 C13 104.7(8) . . ?
O2 C17 C18 104(3) . . ?
C13 C17 C18 111.8(12) . . ?
 
# The following lines are used to test the character set of files sent by
# network email or other means. They are not part of the CIF data set
# abcdefghijklmnopqrstuvwxyzABCDEFGHIJKLMNOPQRSTUVWXYZ0123456789
# !@#$%^&*()_+{}:"~<>?|\-=[];'`,./
 
# END of CIF
